# Supplementary material for: Identification of Wb123 as an Early and Specific Marker of Wuchereria bancrofti Infection
Source: PLoS Negl Trop Dis. 2012 Dec 6;6(12):e1930. doi: 10.1371/journal.pntd.0001930 (PMC3516582; doi:10.1371/journal.pntd.0001930)
Supplement: Table S1 — Annotated Excel table ouput from dCAS of 19 antigens used as potential targets for Wuchereria bancrofti and/or Brugia malayi -specific antibody assays. (XLSX) [file pntd.0001930.s001.xlsx]

## Sheet: Sheet1
Contig Name	Name	Protein Sequence	Best Match to NR	Best Match to GO	All Descriptors	Parent	Second Parent	GO #	Best Match to KOG	General Class	Best Match to SMART	Best Match to PFAM	SecretomeP	Fwd primer name	Sequence specific forward primer	Rev primer name	Sequence specfic reverse primer
Bm024	BmVAH	MTSRHRHFHRFLVFDFSESAQRRIDLPIFAQSFLTDNSTSVATYSCRVAYMYKCVVKNSEGQNEQSLNLCFD	vespid allergen antigen homolog	transport vesicle	protein binding||binding	binding		GO:0005515	Defense-related protein containing SCP domain	Function unknown	SCP, SCP / Tpx-1 / Ag5 / PR-1 / Sc7 family of extracellular domains	SCP, SCP-like extracellular protein	0.7	BM24-5p	ATGACCAGCCGGCACCGGCAC	BM24-3p	TCAGTCGAAGCACAGGTTCAG
Bm097	BmEpicuticulin	LHKHNAHSDKDIISALVMAVSTEQSSVQARQPHAVPALLKFWGHRKKRNNAYGDEAVPPTAGLTLPMPAPAEQAPAQAGQPYAAIVPAPVESSGYRKKRNNAYGDGSFLQLQNWQ	epicuticlin	biological_process - molecular_function - cellular_component	mannosyltransferase activity||transferase activity\, transferring hexosyl groups||transferase activity\, transferring glycosyl groups||transferase activity||catalytic activity	catalytic activity	transferase activity	GO:0000030	Integral membrane protein	General function prediction only	FYVE, Protein present in Fab1, YOTB, Vac1, and EEA1; Zinc-binding domain, possibly involved in endosomal targetting	GKAP, Guanylate-kinase-associated protein (GKAP) protein	SS	BM97-5p	CTGCACAAGCACAACGCCCAC	BM97-3p	TCACTGCCAGTTCTGCAGCTG
Bm134	BmHypothetical	MPLMYQYHGRHYLGAAHGLMGILQMLLCFVEFLDEKAKSDVLETLDWIVSLQLKNGNIPSKVEEEKVDRGENELVHWCHGATGAVHLMIVAYLRTHNEKYLKSADAALNLIWEKGILMGPGLCHGAAGSGYAFLLFHRLTNEQRYLDCALCIAKTFC	CG2061-PA, isoform A	G-protein coupled receptor protein signaling pathway - G-protein coupled receptor activity	G-protein coupled receptor activity||transmembrane receptor activity||receptor activity||signal transducer activity	signal transducer activity	receptor activity	GO:0004930	Lanthionine synthetase C-like protein 1	Defense mechanisms	CNH, Domain found in NIK1-like kinases, mouse citron and yeast ROM1, ROM2; Unpublished observations	LANC_like, Lanthionine synthetase C-like protein	0.45	BM134-5p	ATGCCACTGATGTACCAGTAC	BM134-3p	TCAGCAGAAGGTCTTGGCGAT
Bm222	BmHypothetical	MFLQKKDVVKLTGLVSLEQLLPFPNSKISQNVAQVTVKSRESDKNLKAKVSVTTNLSLNELQLIVGEFVQQELIPDSRLWFLCQSAALNRAGLQSSATIHLATHTLVDSRDGTKYTVQVHSASLLLSMILVYGWQQRLL	F32B5.7						Sulfotransferase	General function prediction only	RasGEFN, Guanine nucleotide exchange factor for Ras-like GTPases; N-terminal motif; A subset of guanine nucleotide exchange factor for Ras-like small GTPases appear to possess this domain N-terminal to the RasGef (Cdc25-like) domain	Dynactin_p22, Dynactin subunit p22	0.38	BM222-5p	ATGTTCCTGCAGAAGAAGGAC	BM222-3p	TCACAGCAGCCGCTGCTGCCA
Bm373	BmES62	SQNYVLEKFGNDTTELIRYITKGDGAGLAYQWLSTLVDGFGHRMVGSDSLEEAIDFLAKSLEEDDFDDVHTEEVPNLPNWVREDDNVEIIEPRHQRLNVLALGGCEPANITGEVVVIRDLDDSKFINVSGKIVVTAQQFKGYPQTVKYRQSVKLFESLGAIGVLIK	aminopeptidase ES-62 precursor	proteolysis - peptide metabolic process - extracellular space - cytoplasm					Golgi proteins involved in ER retention (RER)	Intracellular trafficking, secretion, and vesicular transport	SEC63, Domain of unknown function in Sec63p, Brr2p and other proteins	Rer1, Rer1 family	SS	BM373-5p	AGCCAGAACTACGTGCTGGAG	BM373-3p	TCACTTGATCAGCACGCCGAT
Bm419	Bmpde-2	MYNDESVLEQHHLAVAFKLLQDSNCNFIVSLNKKQRQLFRKLTIEMVLATDMSKHMSILA	PhosphoDiEsterase family member (pde-4)	smooth muscle contraction - cAMP catabolic process	3'\,5'-cyclic-AMP phosphodiesterase activity||3'\,5'-cyclic-nucleotide phosphodiesterase activity||cyclic-nucleotide phosphodiesterase activity||phosphoric diester hydrolase activity||phosphoric ester hydrolase activity||hydrolase activity\, acting on ester bonds||hydrolase activity||catalytic activity	catalytic activity	hydrolase activity	GO:0004115	Cyclic nucleotide phosphodiesterase	Signal transduction mechanisms	HDc, Metal dependent phosphohydrolases with conserved 'HD' motif	PDEase_I, 3'5'-cyclic nucleotide phosphodiesterase	0.43	BM419-5p	ATGTACAACGACGAGAGCGTG	BM419-3p	TCAGCCCAGGTCCCGCTCCCG
Bm499	BmHypothetical	DLKTMVEAKKVAGSSVLTLDKTDRIQVMQTMIHLADLSNPTKPIDLYSIWVKNIMEEYWRQGDRERDLG	Hypothetical protein CBG14607	translational initiation - eukaryotic translation initiation factor 3 complex - translation initiation factor activity - cytosol	translation initiation factor activity||translation factor activity\, nucleic acid binding||translation regulator activity	translation regulator activity	translation factor activity\, nucleic acid binding	GO:0003743	Angiotensin I-converting enzymes - M2 family peptidases	Amino acid transport and metabolism	START, in StAR and phosphatidylcholine transfer protein; putative lipid-binding domain in StAR and phosphatidylcholine transfer protein	Peptidase_M2, Angiotensin-converting enzyme	0.8	BM499-5p	ATGAGCACCCTGGAGAACGCC	BM499-3p	TCAGCACAGGTTGATGGTGCA
Bm698	Bm-wnk-1	MLKGLQHPNIVRFYDYWERQDHTGKKRYIVLVTELMTSGTLKMYLKRFKRINIKVLKSWCRQILKGLSFLHSRNPPVIHRDLKCDNIFITGTTGSVKIGDLGLATLKNKSYAKSVIGTPEFMAPEMYEEMYDESVDVYAFGMCLLEMVTGES	mammalian WNK-type protein kinase homolog family member (wnk-1)	soluble fraction - ion transport - protein binding - protein kinase activity - protein amino acid phosphorylation - vesicular fraction - regulation of cellular process - cytoplasm	protein binding||binding	binding		GO:0005515	Serine/threonine protein kinase	General function prediction only	S_TKc, Serine/Threonine protein kinases, catalytic domain; Phosphotransferases	Pkinase, Protein kinase domain	0.33	BM698-5p	ATGCTGAAGGGCCTGCAGCAC	BM698-3p	TCAGCTCTCGCCGGTCACCAT
Bm827	BmHypothetical	MTLAIGAVHIYARNINCLSTFLLPRVAYCHSKYFTMPKIGTHDGSFHCDEVFAIFLLKSLPEYNNYEIVRSRDKDVLSLCDIVVDVGGEYNHAAMKYDHHQRDFAHTMNTLGVMNFHTKLSSAGLIYAHFGKNVISSLLGLQHDSIIDVLFKKVYQTFVESIDAIDNGIAQFDGKPRYYLGGTLSSRISMLNPAWNEDTVNVHERFMMAIKLVDKEFNELLTYLHKSWLPARSHIINAVTHRYDVDKSGQIFCLEGGGMPWKDHFFLIEEQFHLKNDDIIYVIYEDNVNAQWRVQAIPVNERQPF	C27H6.8	molecular_function - cellular_component - biological_process					Predicted metal-binding protein	General function prediction only	RasGEF, Guanine nucleotide exchange factor for Ras-like small GTPases;	UPF0160, Uncharacterised protein family (UPF0160)	0.72	BM827-5p	ATGACCCTGGCCATCGGCGCC	BM827-3p	TCAGAAGGGCTGCCGCTCGTT
Wb123	WbSerpin	ILGQISLTDRAQLDFAVNLLQNVAESDRSSILSPFSVSTSLFIAYLAADGETKQQLQNALGKTASTSQFRIHFAKQLAYLARAESRNYTLNVANRFYVREEFSTKESFQRVLSFYYNEILYKFNFEQRNELVQEINDWVSNETNNKVTKMITENSITEDTRMLLMNAIHFKGTWTTQFIDFVTKQKQFHISENEVKLVPMMAKSDTVPYYEDDVVKVIKLPYTGGEVEMVVILPKRRFGLSDVLKNLSGEKLLKYVNEAKNRTVSIRMPRFQVEEKRNLNNALQAIGITDAFSGKADFGELLNNSIPISIGKIIHAGFIEVNEKGTESAAATLIELEDRMASSRNFNADEPFLFAIVKDLKTVLFIGQFVK	BmSERPIN	serine-type endopeptidase inhibitor activity - protein binding - cytosol	serine-type endopeptidase inhibitor activity||endopeptidase inhibitor activity||protease inhibitor activity||enzyme inhibitor activity||enzyme regulator activity	enzyme regulator activity	enzyme inhibitor activity	GO:0004867	Serpin	Defense mechanisms	SERPIN, SERine Proteinase INhibitors;	Serpin, Serpin (serine protease inhibitor)	SS	WB123-5p	ATCCTGGGCCAGATCAGCCTG	WB123-3p	TCACTTCACGAACTGGCCGAT
Wb126	WbHypothetical	RSPGIEGPKGVPGKQGPPGPDGPVGSSGPPGEPGPEGPAGSLGPPGEKGPAGPPGIVIEKEGPPGAIGKTGEPGLPGPAGEAGAPGKAGSDGPEGPPGDAGIDGPPGKPGPDGDRGPDGEAGPQGTCDACPPPRTAPGY	gi|159657|gb|AAA29371.1| collagen	protein binding	protein binding||binding	binding		GO:0005515	Collagens (type IV and type XIII), and related proteins	Extracellular structures	PRP, Major prion protein; The prion protein is a major component of scrapie-associated fibrils in Creutzfeldt-Jakob disease, kuru, Gerstmann-Straussler syndrome and bovine spongiform encephalopathy	Collagen, Collagen triple helix repeat (20 copies)	0.55	WB126-5p	CGGAGCCCCGGCATCGAGGGC	WB126-3p	TCAGTAGCCGGGGGCGGTCCG
Wb132	WbEndochitinase	MKSAFVEEAKTSGKQRLLLTAAVSAGKGTIDGSYDVESLGKNFDLLFLMSYDLHGSWEKNVDLHGKLRPTKGEVSGIGIFNTEFAANYWASKGMPKQKIIIGIPMYAQGWTLDNPSKTAIGAAASRPSSASKTNPAGGTASYWEICKYLKEGGKETVDREGVGVYMVKGDQWYGYDNEETIKIKMKWLKEKGYGGAFIWALDFDDFTGKSCGKGPYPLLNAINSELEGESEWTENPELPT	cuticular endochitinase	extracellular space	chitinase activity||hydrolase activity\, hydrolyzing O-glycosyl compounds||hydrolase activity\, acting on glycosyl bonds||hydrolase activity||catalytic activity	catalytic activity	hydrolase activity	GO:0004568	Chitinase	Carbohydrate transport and metabolism	Glyco_18, Glyco_18 domain	Glyco_hydro_18, Glycosyl hydrolases family 18	0.32	WB132-5p	ATGAAGAGCGCCTTCGTGGAG	WB132-3p	TCAGGTGGGCAGCTCGGGGTT
Wb153	WbHypothetical	MPFLFCDFNNVCNYASRNDKSYWLSTTAPIPMMPVNEQGIEPYISRCAVCEAPANVIAVHSQTIQIPNCPNGWNSLWIGYSFAMHTGAGAEGGGQSLSSPGSCLEDFRATPFIECNGARGSCHYFANKFSFWLTTIEDDQQFRIPESETLKSGSLRTRVSRCQVCIKATDSSRLPYKQ	gi|460246|gb|AAC46611.1| a2 (IV) basement membrane collagen	collagen type IV - cellular component organization and biogenesis - extracellular matrix structural constituent conferring tensile strength	extracellular matrix structural constituent conferring tensile strength||extracellular matrix structural constituent||structural molecule activity	structural molecule activity	extracellular matrix structural constituent	GO:0030020	Mitochondrial ATP-dependent protease PIM1/LON	Posttranslational modification, protein turnover, chaperones	C4, C-terminal tandem repeated domain in type 4 procollagens; Duplicated domain in C-terminus of type 4 collagens	C4, C-terminal tandem repeated domain in type 4 procollagen	0.89	WB153-5p	ATGCCCTTCCTGTTCTGCGAC	WB153-3p	TCACTGCTTGTAGGGCAGCCT
Wb261	WbHypothetical	MCTDANSFLRSILPYIGSKITRLHISLPTIIDGVFSLITQCLPNLSHLALDVKHINNKLLRLFFTGGIHSPGSRLRSLKLCRLRTTYRALFAIARGAHSITDLEVSHIPCVDDRFLALLADNCMGLKNINLNGCRYVTDKGLAALARKCCLRKCEFVQRHVQTSQYICWRSFVLTLSGYHTLILADVQSSVISIAVSQDLCARVIVNKNN	T01E8.1	ubiquitin-protein ligase activity - ubiquitin-dependent protein catabolic process	ubiquitin-protein ligase activity||acid-amino acid ligase activity||ligase activity\, forming carbon-nitrogen bonds||ligase activity||catalytic activity	catalytic activity	ligase activity	GO:0004842	Leucine rich repeat proteins, some proteins contain F-box	General function prediction only	LRR_CC, Leucine-rich repeat - CC (cysteine-containing) subfamily;	Pex2_Pex12, Pex2 / Pex12 amino terminal region	0.35	WB261-5p	ATGTGCACCGACGCCAACAGC	WB261-3p	TCAGTTGTTCTTGTTCACGAT
Wb267	WbHypothetical	MNSQTETSKSKHQLECLKEEVGSKLRIFPDFPKPGIKFVDVMVLMRYPLLLEELCAAVAQHARVEMPVTIDAVAGLEARGFLFGPQIAMMLKVPFVPIRKKGKLPGRTHKEVYQKEYGEDVIEVQEDAIKQGSKILLVDDLLATGGSLKAAVSLVEKAGGDVAGAFTLIELAYLEPRKYLPGHIHIHSFITLTE	Hypothetical protein CBG14916	adenine phosphoribosyltransferase activity - nucleus - cytoplasm - AMP biosynthetic process - adenine salvage	adenine phosphoribosyltransferase activity||transferase activity\, transferring pentosyl groups||transferase activity\, transferring glycosyl groups||transferase activity||catalytic activity	catalytic activity	transferase activity	GO:0003999	Adenine phosphoribosyl transferases	Nucleotide transport and metabolism	HMG, high mobility group;	Pribosyltran, Phosphoribosyl transferase domain	0.58	WB267-5p	ATGAACAGCCAGACCGAGACC	WB267-3p	TCACTCGGTCAGGGTGATGAA
Wb289	WbHypothetical	FETCVDKFCPLGTYCEERNIVSCGNPPCRPLLVCMPDNTKGCKSHPPCPAGKVCAEKLVPCIGRSCRKIAKCVLPGTCDAMECPPSHKCVMNPGPTCVKTILSAEDIARMNEQVH	Hypothetical protein CBG15182	protein binding	protein binding||binding	binding		GO:0005515	Ultrahigh sulfur keratin-associated protein	Extracellular structures	VWC_out, von Willebrand factor (vWF) type C domain;	Keratin_B2, Keratin, high sulfur B2 protein	SS	WB289-5p	TTCGAGACCTGCGTGGACAAG	WB289-3p	TCAGTGCACCTGCTCGTTCAT
Wb352	WbHypothetical	MVTIVSKLDTAHRLTIHDAQMNYYGTRLATCSSDNLIKIFELKPSGQTYPSAELNGHTGPVWQVSWAHPKFDNVLASCSYDKRVIIWKEISGKWQRIYEWNHHDASVNSISWAPHQFGLTLACASTDTAVSLLIFNKAKIWTHQLIAKAHEQGCNAVSWAPAMYSTSLVHSDGPVIRNEWFLVAMIILLNMESKEDGIGN	PREDICTED: similar to SEC13-like 1 isoform b	protein transporter activity - transport - protein transport - intracellular protein transport - ER to Golgi vesicle-mediated transport	protein transporter activity||transporter activity	transporter activity		GO:0008565	Vesicle coat complex COPII, subunit SEC13	Intracellular trafficking, secretion, and vesicular transport	WD40, WD40 repeats; Note that these repeats are permuted with respect to the structural repeats (blades) of the beta propeller domain	WD40, WD domain, G-beta repeat	0.63	WB352-5p	ATGGTGACCATCGTGAGCAAG	WB352-3p	TCAGTTGCCGATGCCGTCCTC
Wb443	WbHypothetical	MLAEISSLLNEKQYNIIVIKCEDLSSPAFLQLCMVDYAVKKDVKVICVSATRNMLAFKAMASKVMIRLSEKLKFLSVSELLPNGFINDDDNTFFACILKVVTFQSKDQISNIILHESDIVIRIKRIGNGFAKDVTGQLYVMERSGEAPFAENIFNYHLSDRSARLFPPGMSRPKL	PREDICTED: hypothetical protein						Semaphorins	Signal transduction mechanisms	IL10, Interleukin-10 family; Interleukin-10 inhibits the synthesis of a number of cytokines, including IFN-gamma, IL-2, IL-3, TNF and GM-CSF produced by activated macrophages and by helper T cells	Polysacc_synt, Polysaccharide biosynthesis protein	0.62	WB443-5p	ATGCTGGCCGAGATCAGCAGC	WB443-3p	TCACAGCTTGGGCCGGCTCAT
Wb610	Wbpat-6	MKCHYDEYFGQALRVRRLIKMDFDRVFRKEGCDILLTPVTSGIPPLFSEISDTDGYKRECQDDFYTQPCNLAGVPAISVPFMRTADGFPIGVQIIADHLKDGTALDVAEKLYEYSVAQL	Paralysed Arrest at Two-fold family member (pat-6)	protein binding	protein binding||binding	binding		GO:0005515	Alpha-parvin and related focal adhesion proteins	Cytoskeleton	FH, FORKHEAD; FORKHEAD, also known as a "winged helix"	Amidase, Amidase	0.61	WB610-5p	ATGCCCTTCCTGTTCTGCGAC	WB610-3p	TCACTGCTTGTAGGGCAGCCT
